# Supplementary material for: Synergistic effect of imp/ostA and msbA in hydrophobic drug resistance of Helicobacter pylori
Source: PubMed Central journal article supplement (PMC2719649; doi:10.1186/1471-2180-9-136), 2009-07-13
Supplement: 1471-2180-9-136-S1.pdf [file 1471-2180-9-136-S1.pdf]

## Supplementary Table

**Table S1.** Genes were upregulated after glutaraldehyde treatment\*

| Cellular role category              | Fold change | ORF      | ORF       | Common name and function #                                                         |
|-------------------------------------|-------------|----------|-----------|------------------------------------------------------------------------------------|
|                                     |             | HP no. † | JHP no. † |                                                                                    |
| Hypothetical                        | 19.818      | HP1004   | N/A       | Hypothetical protein                                                               |
| Transporter                         | 13.700      | HP0653   | JHP0598   | Nonheme iron-containing ferritin, <i>pfr</i>                                       |
| Conserved hypothetical              | 9.218       | HP1216   | JHP1138   | Conserved hypothetical secreted protein, <i>imp/osta</i>                           |
| Amino acid biosynthesis             | 8.968       | HP0652   | JHP0597   | Phosphoserine phosphatase, <i>serB</i>                                             |
| Hypothetical                        | 7.341       | HP1440   | JHP1333   | Hypothetical protein                                                               |
| Energy metabolism                   | 7.321       | HP1238   | JHP1159   | Formamidase, <i>aimF</i>                                                           |
| Transporter                         | 6.848       | HP0715   | JHP0653   | ABC transporter, ATP-binding protein                                               |
| Hypothetical                        | 6.673       | HP0412   | JHP0970   | Hypothetical protein                                                               |
| Hypothetical                        | 5.662       | HP0365   | N/A       | Hypothetical protein                                                               |
| Biosynthesis and metabolism         | 5.015       | HP0642   | JHP0586   | NAD(P)H-flavin oxidoreductase, <i>frxA</i>                                         |
| Cell envelope                       | 4.959       | HP0651   | JHP0596   | Alpha 1,3-fucosyltransferase, <i>futB</i>                                          |
| Hypothetical                        | 4.937       | HP1502   | JHP1395   | Hypothetical protein                                                               |
| Chaperone                           | 4.488       | HP0109   | JHP0101   | Chaperone and heat shock protein 70, <i>dnaK</i>                                   |
| Transporter                         | 4.429       | HP0889   | JHP0822   | Iron(III) dicitrate ABC transporter, permease protein, <i>fecD</i>                 |
| Cell envelope                       | 4.414       | HP0057   | JHP0049   | Lipoprotein, putative                                                              |
| Cell envelope                       | 4.397       | HP0511   | N/A       | Lipoprotein Lpp, an urease enhancing factor                                        |
| Hypothetical                        | 4.282       | HP0641   | JHP0584   | Hypothetical protein                                                               |
| Regulatory                          | 4.232       | HP0111   | JHP0103   | Heat-inducible transcription repressor of<br>Class I heat shock genes, <i>hrcA</i> |
| Hypothetical                        | 4.160       | HP0174   | JHP0160   | Membrane protein, putative                                                         |
| Cell envelope                       | 4.084       | HP0549   | JHP0496   | Glutamate racemase, <i>glr, murl</i>                                               |
| DNA metabolism                      | 3.946       | HP1383   | N/A       | Type I R-M system specificity subunit, <i>hsdS6</i>                                |
| Protein synthesis and<br>processing | 3.808       | HP1497   | JHP1390   | Peptidyl-tRNA hydrolase, <i>pth</i>                                                |
| Biosynthesis and metabolism         | 3.731       | HP1254   | JHP1175   | Biotin synthesis protein, <i>bioC</i>                                              |
| Motility                            | 3.617       | HP0752   | JHP0689   | Flagellar hook-associated protein 2 (HAP2), <i>fliD</i>                            |
| Hypothetical                        | 3.527       | HP0287   | JHP0272   | Hypothetical protein                                                               |
| Conserved hypothetical              | 3.424       | HP0926   | JHP0860   | Conserved hypothetical protein                                                     |
| Conserved hypothetical              | 3.412       | HP0965   | JHP0899   | Remnant pseudogene of an ancestral ATP/GTP-binding protein                         |
| Hypothetical                        | 3.353       | HP0754   | JHP0691   | Hypothetical protein                                                               |

|                                                            |       |        |         |                                                                                       |
|------------------------------------------------------------|-------|--------|---------|---------------------------------------------------------------------------------------|
| Biosynthesis and metabolism                                | 3.285 | HP0240 | JHP0225 | Octaprenyl-diphosphate synthase, <i>ispB</i>                                          |
| Biosynthesis and metabolism                                | 3.221 | HP0211 | JHP0197 | Cysteine-rich protein A, <i>hcpA</i>                                                  |
| DNA/RNA synthesis and processing                           | 3.217 | HP0602 | JHP0549 | Novel 3-methyladenine DNA glycosylase involved in base excision repair, <i>magIII</i> |
| Hypothetical                                               | 3.159 | HP1176 | N/A     | Hypothetical protein                                                                  |
| Biosynthesis and metabolism                                | 3.136 | HP1461 | JHP1354 | Cytochrome c551 peroxidase                                                            |
| Motility                                                   | 3.112 | HP1119 | JHP1047 | Flagellar hook-associated protein 1 (HAP1), <i>flgK</i>                               |
| Amino acid biosynthesis                                    | 3.040 | HP0107 | JHP0099 | Cysteine synthetase, <i>cysK</i>                                                      |
| Conserved hypothetical                                     | 2.825 | HP1026 | JHP0398 | Conserved hypothetical helicase-like protein                                          |
| Transporter                                                | 2.661 | HP1082 | JHP0343 | Multidrug resistance protein, <i>msbA</i>                                             |
| Hypothetical                                               | 2.631 | HP0918 | JHP0852 | Hypothetical protein                                                                  |
| Protein synthesis and processing                           | 2.598 | HP0223 | JHP0209 | DNA repair protein, <i>radA</i>                                                       |
| Biosynthesis of cofactors, prosthetic groups, and carriers | 2.589 | HP0221 | JHP0207 | NifU-like protein involved in [Fe-S] cluster assembly, <i>nifU</i>                    |

\* Genes listed here are according to microarray analysis differed more than 2.5-fold in *H. pylori* NTUH-S1 glutaraldehyde treatment compared to *H. pylori* NTUH-S1 without glutaraldehyde treatment.

† ORFs are according to the whole genome sequences of *H. pylori* 26695 and J99.

# Common name and function of each ORF are according to the PyloriGene database (<http://genolist.pasteur.fr/PyloriGene>).

**Table S2.** Genes were downregulated after glutaraldehyde treatment\*

| Cellular role category                                     | Fold change | ORF     | ORF      | Common name and function #                                                                                 |
|------------------------------------------------------------|-------------|---------|----------|------------------------------------------------------------------------------------------------------------|
|                                                            |             | HP no.† | JHP no.‡ |                                                                                                            |
| Central intermediary metabolism                            | 10.870      | HP1186  | JHP1112  | Carbonic anhydrase, <i>cah</i>                                                                             |
| Transport and binding protein                              | 7.246       | HP1400  | JHP1426  | Iron(III) dicitrate transport protein, <i>fecA3</i>                                                        |
| Fatty acid and phospholipids metabolism                    | 6.329       | HP0690  | JHP0638  | Acetyl coenzyme A acetyltransferase (thiolase) involved in the TCA cycle, <i>fadA</i>                      |
| Amino acid biosynthesis                                    | 5.952       | HP0691  | JHP0637  | Succinyl-CoA-transferase subunit A of the succinyl-coenzyme A (CoA) involved in the TCA cycle, <i>yjD</i>  |
| Hypothetical                                               | 5.814       | HP1175  | JHP1102  | Integral membrane protein                                                                                  |
| Amino acid biosynthesis                                    | 4.808       | HP0695  | JHP0633  | N-methylhydantoinase                                                                                       |
| Fatty acid and phospholipids metabolism                    | 4.587       | HP0090  | JHP0083  | Malonyl coenzyme A-acyl carrier protein transacylase, <i>fabD</i>                                          |
| Fatty acid and phospholipids metabolism                    | 4.348       | HP1045  | N/A      | Acetyl-CoA synthetase, <i>acoE</i>                                                                         |
| Transport and binding protein                              | 4.184       | HP1512  | JHP1405  | Nickel-regulated outer membrane protein, <i>frpB-3</i>                                                     |
| Energy metabolism                                          | 4.016       | HP0193  | JHP0179  | Fumarate reductase, cytochrome b subunit, <i>frdC</i>                                                      |
| Biosynthesis of cofactors, prosthetic groups, and carriers | 3.984       | HP1582  | JHP1489  | Pyridoxal phosphate biosynthetic protein J, <i>pdxJ</i>                                                    |
| Hypothetical                                               | 3.788       | HP0489  | JHP0441  | Hypothetical protein                                                                                       |
| Central intermediary metabolism                            | 3.717       | HP0089  | JHP0082  | S-adenosylhomocysteine nucleosidase involved in S-adenosylmethionine recycling into methionine, <i>pfs</i> |
| Energy metabolism                                          | 3.559       | HP0692  | JHP0636  | Succinyl-CoA-transferase subunit B of the succinyl-coenzyme A (CoA) involved in the TCA cycle, <i>yjE</i>  |
| Transport and binding protein                              | 3.559       | HP0299  | JHP0284  | Dipeptide ABC transporter, permease protein, <i>dppB</i>                                                   |
| Transport and binding protein                              | 3.546       | HP0214  | JHP0200  | Sodium-dependent transporter, <i>huNaDC-1</i>                                                              |
| Hypothetical                                               | 3.534       | HP0697  | JHP0631  | Hypothetical protein                                                                                       |
| Cell envelope                                              | 3.390       | HP0253  | JHP0238  | Outer membrane protein, <i>hopG</i>                                                                        |
| Energy metabolism                                          | 3.175       | HP0696  | JHP0632  | N-methylhydantoinase                                                                                       |
| Hypothetical                                               | 3.115       | HP0015  | JHP0013  | Hypothetical protein                                                                                       |
| Conserved hypothetical                                     | 3.067       | HP0709  | JHP0648  | Conserved hypothetical protein                                                                             |
| Energy metabolism                                          | 3.040       | HP0588  | JHP0536  | OorD subunit of the 2-oxoglutarate oxidoreductase involved in the TCA cycle, <i>oorD</i>                   |
| Amino acid biosynthesis                                    | 3.012       | HP0096  | JHP0088  | D-2-hydroxyacid dehydrogenase                                                                              |

|                                                            |       |        |         |                                                                                          |
|------------------------------------------------------------|-------|--------|---------|------------------------------------------------------------------------------------------|
| Cell envelope                                              | 2.994 | HP1167 | JHP1094 | Outer membrane protein, <i>hofH</i>                                                      |
| Cell envelope                                              | 2.967 | HP0710 | JHP0649 | Outer membrane protein, <i>homA</i>                                                      |
| Biosynthesis of cofactors, prosthetic groups, and carriers | 2.817 | HP1118 | JHP1046 | Gamma-glutamyltranspeptidase, <i>ggt</i>                                                 |
| Transport and binding protein                              | 2.770 | HP0300 | JHP0285 | Dipeptide ABC transporter, permease protein, <i>dppC</i>                                 |
| Energy metabolism                                          | 2.762 | HP0590 | JHP0538 | OorB subunit of the 2-oxoglutarate oxidoreductase involved in the TCA cycle, <i>oorB</i> |
| Transport and binding proteins                             | 2.717 | HP0693 | JHP0635 | Short-chain fatty acids transporter, <i>atoE</i>                                         |
| Fatty acid and phospholipid metabolism                     | 2.710 | HP0891 | JHP0824 | Acyl coenzyme A thioesterase, <i>vdID</i>                                                |
| Conserved hypothetical                                     | 2.646 | HP0920 | JHP0854 | Integral membrane protein                                                                |

\* Genes listed here are according to microarray analysis differed more than 2.5-fold downregulated in *H. pylori* NTUH-S1 glutaraldehyde treatment compared to *H. pylori* NTUH-S1 without glutaraldehyde treatment.

† ORFs are according to the whole genome sequences of *H. pylori* 26695 and J99.

# Common name and function of each gene are according to the PyloriGene database (<http://genolist.pasteur.fr/PyloriGene>).
